# Supplementary material for: Dynamic transcription profiles of “Qinguan” apple (Malus × domestica) leaves in response to Marssonina coronaria inoculation
Source: Front Plant Sci. 2015 Oct 13;6:842. doi: 10.3389/fpls.2015.00842 (PMC4602106; doi:10.3389/fpls.2015.00842)
Supplement: Supplementary file 1 [file Table1.XLS]

## Sheet: 12 hpi
	Supplementary Table S1 list of DEGs with the FPKM ratio>5 or <-5 between inoculation and control at different time points post inoculation
DEGs ID	Description	E-value	log2FC
MDP0000294660	Translocase of chloroplast 159, chloroplastic	0	9.66759
MDP0000943643	Eukaryotic peptide chain release factor subunit 1-3	0	7.7782
MDP0000699611	Zinc finger CCCH domain-containing protein 66	0	7.75873
MDP0000570730	Protein BPS1, chloroplastic	0	7.69868
MDP0000872008	Translocase of chloroplast 132, chloroplastic	0	7.64135
MDP0000132294	phosphoinositide binding	0	7.32123
MDP0000281934	Pentatricopeptide repeat-containing protein At4g31850, chloroplastic	0	6.14764
MDP0000895328	Putative disease resistance RPP13-like protein 1	5.55112e-15	5.84932
Apple_newGene_1039		1.73195e-14	5.793
MDP0000575908	Scarecrow-like protein 4	3.77476e-14	5.7542
MDP0000902602	FUNCTIONS IN: molecular_function unknown; INVOLVED IN: biological_process unknown; LOCATED IN: Golgi apparatus, plasma membrane; EXPRESSED IN: 23 plant structures; EXPRESSED DURING: 12 growth stages; BEST Arabidopsis thaliana protein match is: methyltransferase (TAIR:AT5G40830.2); Has 127 Blast hits to 127 proteins in 12 species: Archae - 0; Bacteria - 0; Metazoa - 0; Fungi - 0; Plants - 127; Vir…	3.77476e-14	5.7542
MDP0000676815	Chaperone protein dnaJ	1.85518e-13	5.67331
MDP0000122563	VQ motif-containing protein	1.17464e-11	5.44869
MDP0000187580	F-box protein At5g46170	1.17464e-11	5.44869
MDP0000656152	Chlorophyll a-b binding protein 40, chloroplastic	4.29379e-11	5.37387
MDP0000138972	RNA-binding (RRM/RBD/RNP motifs) family protein	0	5.37084
MDP0000888428	Zinc transporter 5	6.65167e-11	5.34804
MDP0000208874	Pentatricopeptide repeat-containing protein At5g03800	1.03341e-10	5.32174
MDP0000210169	DnaJ homolog subfamily B member 5	1.6102e-10	5.29496
MDP0000126616	Putative uncharacterized protein	2.51636e-10	5.26766
MDP0000193220	UDP-glucose 6-dehydrogenase	9.77987e-10	5.18254
MDP0000379586	E3 ubiquitin-protein ligase RING1-like	2.45542e-09	5.12287
Apple_newGene_2723		3.90935e-09	5.09208
MDP0000199580	General transcription factor 3C polypeptide 3	3.90935e-09	5.09208
MDP0000700707	LYR motif-containing protein 4	6.24451e-09	5.06062
MDP0000313460	CBL-interacting serine/threonine-protein kinase 10	3.20639e-09	-5.11198
MDP0000150109	60S ribosomal protein L5	0	-5.11561
MDP0000245975	Peroxisomal targeting signal 2 receptor	5.24362e-10	-5.22894
Apple_newGene_2934		2.47175e-11	-5.41324
MDP0000157871	Monodehydroascorbate reductase, seedling isozyme	1.17684e-14	-5.81979
MDP0000244946	Anthocyanidin 3-O-glucosyltransferase 5	8.10463e-15	-5.83831
MDP0000304607	FACT complex subunit SPT16	0	-6.29253
MDP0000703260	unknown protein	0	-6.31916
MDP0000198531	Zinc finger protein CONSTANS-LIKE 2	0	-6.65847
MDP0000310392	Putative nucleobase-ascorbate transporter 10	0	-6.83491
MDP0000211556	Lipoxygenase 2, chloroplastic	0	-7.00524
MDP0000516622	ABC transporter F family member 4	0	-7.29885
MDP0000150549	60S ribosomal protein L26-2	0	-7.84699

## Sheet: 24 hpi
	Supplementary Table S1 list of DEGs with the FPKM ratio>5 or <-5 between inoculation and control at different time points post inoculation
DEGs ID	Description	E-value	log2FC
MDP0000211556	Lipoxygenase 2, chloroplastic	0	9.68178
MDP0000258387	S-adenosylmethionine synthase 2	0	9.32238
Apple_newGene_2903		0	8.34196
MDP0000881736	Eukaryotic translation initiation factor 3 subunit D	0	7.5761
MDP0000407802	Exocyst complex component 7	0	7.5163
Apple_newGene_4775		0	7.50095
MDP0000575908	Scarecrow-like protein 4	0	7.1538
MDP0000701112	RanBP2-like and GRIP domain-containing protein 4	0	6.99856
MDP0000578306	Regulator of ribonuclease-like protein 2	0	6.93146
MDP0000129053	Hydroquinone glucosyltransferase	0	6.80981
MDP0000281934	Pentatricopeptide repeat-containing protein At4g31850, chloroplastic	0	6.27632
MDP0000147216	Protein TRANSPARENT TESTA 12	0	6.2212
MDP0000305007	Isopenicillin N epimerase	0	6.20235
MDP0000194070	F-box/WD-40 repeat-containing protein At5g21040	2.88658e-15	6.0206
MDP0000463166	Disease resistance protein At4g27190	1.39888e-14	5.95454
MDP0000123467	Probable WRKY transcription factor 75	0	5.884
MDP0000172840	DNA-directed RNA polymerases I, II, and III subunit RPABC2	5.70544e-13	5.78752
MDP0000700707	LYR motif-containing protein 4	5.70544e-13	5.78752
MDP0000207937	Pyridoxal biosynthesis protein PDX1.3	0	5.76531
MDP0000935832	Heat shock cognate 70 kDa protein 4	9.77107e-13	5.762
MDP0000560467	Epidermis-specific secreted glycoprotein EP1	0	5.68518
MDP0000573176	Zinc finger protein 1	8.58469e-12	5.65515
MDP0000138972	RNA-binding (RRM/RBD/RNP motifs) family protein	8.58469e-12	5.65515
MDP0000128950	F-box/kelch-repeat protein At3g06240	1.36356e-10	5.50939
MDP0000360394		2.38653e-10	5.47839
MDP0000152377	E3 ubiquitin-protein ligase EL5	4.18644e-10	5.4467
MDP0000296652	Cysteine proteinase RD21a	0	5.31053
MDP0000268608	Cysteine proteinase RD21a	7.19981e-09	5.27691
MDP0000191398	6-phosphogluconate dehydrogenase, decarboxylating	0	5.24141
MDP0000316801	LIGULELESS1 protein, putative	1.28083e-08	5.24041
MDP0000258562	Ethylene-responsive transcription factor ERF008	1.28083e-08	5.24041
MDP0000208874	Pentatricopeptide repeat-containing protein At5g03800	4.08305e-08	5.16453
MDP0000597087	unknown protein	7.31682e-08	5.12503
MDP0000828077	Aquaporin TIP1-3	1.31442e-07	5.08443
MDP0000244946	Anthocyanidin 3-O-glucosyltransferase 5	1.29674e-13	5.02182
MDP0000431696	Expansin-A8	4.72955e-14	-5.06487
MDP0000312457	Probable esterase At1g33990	4.08305e-08	-5.16453
MDP0000213979	unknown protein	2.28408e-08	-5.20297
MDP0000297646	Ethylene-responsive transcription factor ERF003	1.28083e-08	-5.24041
MDP0000195610	Major allergen Pru ar 1	5.55112e-16	-5.24411
MDP0000756425	unknown protein	5.55112e-16	-5.24411
MDP0000168825	Metallothionein-like protein	2.29129e-09	-5.34724
Apple_newGene_5963		8.58469e-12	-5.65515
MDP0000166283	Vacuolar-processing enzyme	2.36478e-14	-5.93183
MDP0000772371	VQ motif-containing protein	1.39888e-14	-5.95454
Apple_newGene_884		0	-5.97369
MDP0000276303	Endo-1,3	2.88658e-15	-6.0206
MDP0000177132	Mitochondrial import inner membrane translocase subunit Tim17-B	5.55112e-16	-6.08376
MDP0000181641	Zinc finger CCCH domain-containing protein 20	0	-6.43007
MDP0000706530	50S ribosomal protein L10, chloroplastic	0	-6.6685
MDP0000193220	UDP-glucose 6-dehydrogenase	0	-7.20204
MDP0000566547	Probable receptor-like protein kinase At5g39020	0	-7.25788

## Sheet: 48 hpi
	Supplementary Table S1 list of DEGs with the FPKM ratio>5 or <-5 between inoculation and control at different time points post inoculation
DEGs ID	Description	E-value	log2FC
MDP0000211556	Lipoxygenase 2, chloroplastic	0	9.77781
MDP0000863147	universal stress protein (USP) family protein	0	7.74279
MDP0000668252	unknown protein	0	6.93496
MDP0000310392	Putative nucleobase-ascorbate transporter 10	0	6.44909
MDP0000304607	FACT complex subunit SPT16	0	6.37501
MDP0000199580	General transcription factor 3C polypeptide 3	1.55431e-15	6.14918
Apple_newGene_2829		1.62093e-14	6.05742
Apple_newGene_4706		5.53557e-13	5.90782
MDP0000888428	Zinc transporter 5	2.00105e-11	5.7409
MDP0000321891	E3 ubiquitin-protein ligase RING1-like	8.97534e-09	5.41095
MDP0000907077	Light-induced protein, chloroplastic	1.66771e-08	5.37339
MDP0000244527	Structural maintenance of chromosomes protein 5	1.08065e-07	5.25447
Apple_newGene_5871		7.1099e-07	5.12485
Apple_newGene_6259		1.33684e-06	5.07892
MDP0000127605	Squalene synthase	2.51795e-06	-5.03149
Apple_newGene_7198		7.1099e-07	-5.12485
MDP0000248907	Cysteine-rich repeat secretory protein 55	9.21485e-15	-5.14857
MDP0000259369	Beta-amyrin synthase	3.78787e-07	-5.16936
Apple_newGene_5472		2.61255e-09	-5.48325
MDP0000935832	Heat shock cognate 70 kDa protein 4	2.61255e-09	-5.48325
MDP0000595474	Pentatricopeptide repeat-containing protein At3g49170, chloroplastic	1.41299e-09	-5.51809
MDP0000319417	Sigma factor sigB regulation protein rsbQ	1.22879e-10	-5.64959
MDP0000193220	UDP-glucose 6-dehydrogenase	6.69964e-11	-5.68067
MDP0000181641	Zinc finger CCCH domain-containing protein 20	2.00105e-11	-5.7409
Apple_newGene_2723		3.33067e-16	-6.21436
MDP0000463166	Disease resistance protein At4g27190	0	-6.69726
MDP0000777332	Quinone oxidoreductase-like protein 2 homolog	0	-6.77133
MDP0000260056	Transcription factor TCP19	0	-6.84178
MDP0000415110	unknown protein	0	-7.20461

## Sheet: 72 hpi
	Supplementary Table S1 list of DEGs with the FPKM ratio>5 or <-5 between inoculation and control at different time points post inoculation
DEGs ID	Description	E-value	log2FC
MDP0000211556	Lipoxygenase 2, chloroplastic	0	8.18513
MDP0000276691	transcription factor	0	6.73602
MDP0000321891	E3 ubiquitin-protein ligase RING1-like	0	6.7209
Apple_newGene_3370		0	6.41747
MDP0000193220	UDP-glucose 6-dehydrogenase	2.22045e-16	6.2379
Apple_newGene_4864		2.10942e-15	6.1503
MDP0000141081	ubiquitin-associated (UBA)/TS-N domain-containing protein	6.66134e-15	6.10442
MDP0000392057	CCR4-NOT transcription complex subunit 10	1.32006e-13	5.98291
MDP0000216647	pollen Ole e 1 allergen and extensin family protein	8.06244e-13	5.90477
MDP0000708927	Pentatricopeptide repeat-containing protein At2g29760, chloroplastic	2.71105e-12	5.85022
MDP0000700707	LYR motif-containing protein 4	3.11656e-11	5.73451
MDP0000181641	Zinc finger CCCH domain-containing protein 20	5.75858e-11	5.70407
MDP0000932564	Chaperone protein dnaJ	5.75858e-11	5.70407
MDP0000892891	Histone H1	0	5.69831
MDP0000316002	glycosyltransferase family 14 protein / core-2/I-branching enzyme family protein	0	5.63799
Apple_newGene_4188		1.26674e-09	5.54143
MDP0000253316	Vacuolar-sorting receptor 2	2.88824e-08	5.3581
MDP0000200382	Pentatricopeptide repeat-containing protein At5g47360	5.42155e-08	5.31846
Apple_newGene_4123		2.44703e-06	5.05462
MDP0000190916	Putative serine/threonine-protein kinase receptor	4.05904e-06	-5.01262
MDP0000708926	Pentatricopeptide repeat-containing protein At5g65560	2.13009e-06	-5.06171
MDP0000859587	CBL-interacting serine/threonine-protein kinase 10	2.13009e-06	-5.06171
Apple_newGene_4784		1.29393e-08	-5.40381
Apple_newGene_4706		1.35182e-11	-5.77149
MDP0000310392	Putative nucleobase-ascorbate transporter 10	2.22045e-16	-6.2237
MDP0000316801	LIGULELESS1 protein, putative	0	-6.53308
MDP0000172840	DNA-directed RNA polymerases I, II, and III subunit RPABC2	0	-6.74326
Apple_newGene_3484		0	-6.81658
MDP0000863147	universal stress protein (USP) family protein	0	-7.88708
