# Supplementary material for: Dynamic transcription profiles of “Qinguan” apple (Malus × domestica) leaves in response to Marssonina coronaria inoculation
Source: Front Plant Sci. 2015 Oct 13;6:842. doi: 10.3389/fpls.2015.00842 (PMC4602106; doi:10.3389/fpls.2015.00842)
Supplement: Supplementary file 2 [file Table2.XLS]

## Sheet: 12 GO_DEGs
	Supplementary Table S2 List of DEGs in significantly enriched GO terms
enriched Go terms	DEGs ID
Cellular component
Cytosol	MDP0000166604	MDP0000135827	MDP0000245975	MDP0000262805	MDP0000889408	MDP0000464702	MDP0000218360	Apple_newGene_4800	MDP0000194035	MDP0000161016	MDP0000259414	MDP0000012541	MDP0000475472	MDP0000304608	MDP0000163831	MDP0000216638	Apple_newGene_647	MDP0000407802	MDP0000278726	MDP0000335393	Apple_newGene_2490	MDP0000256656	MDP0000383765	Apple_newGene_3014	MDP0000010587	MDP0000232945	MDP0000772420	Apple_newGene_2982	MDP0000203818	Apple_newGene_5137	Apple_newGene_4810	MDP0000224857	MDP0000305441	MDP0000886138	MDP0000252504	MDP0000432904	MDP0000276730	MDP0000206447	MDP0000280910	MDP0000291992	MDP0000560112	MDP0000570186	MDP0000514023	Apple_newGene_3662	MDP0000893535	Apple_newGene_2398	Apple_newGene_5272	Apple_newGene_3378	Apple_newGene_5890
COPII vesicle coat	MDP0000320332	MDP0000184049	MDP0000213649	MDP0000823692	MDP0000304608
1,3-beta-D-glucan synthase complex	MDP0000229527	MDP0000177875	MDP0000318573	MDP0000230907	MDP0000169993	MDP0000915307
Plasmodesma	MDP0000302212	MDP0000166604	Apple_newGene_6555	MDP0000431696	MDP0000296652	Apple_newGene_2892	MDP0000322409	MDP0000399716	MDP0000636876	MDP0000252899	MDP0000307848	Apple_newGene_4800	MDP0000224180	MDP0000194035	MDP0000279220	MDP0000915307	MDP0000213729	MDP0000259414	MDP0000457082	Apple_newGene_1984	Apple_newGene_657	MDP0000224741	MDP0000306873	MDP0000312359	MDP0000213066	MDP0000144864	MDP0000168665	Apple_newGene_4285	Apple_newGene_2490	MDP0000573171	MDP0000361876	MDP0000478441	MDP0000210204	MDP0000232945	Apple_newGene_6693	MDP0000182151	MDP0000772420	Apple_newGene_2982	Apple_newGene_5137	MDP0000003574	MDP0000224857	MDP0000329552	MDP0000683891	Apple_newGene_5554	Apple_newGene_7203	MDP0000230883	MDP0000230907	Apple_newGene_2397	Apple_newGene_5863
Molecular function
Cadmium ion transmembrane transporter activity	MDP0000278580	Apple_newGene_4800	Apple_newGene_2398	Apple_newGene_4285	Apple_newGene_7203	Apple_newGene_5137	MDP0000224180	Apple_newGene_5641	Apple_newGene_2397	Apple_newGene_4799
Organic phosphonate transmembrane-transporting ATPase activity		MDP0000278580	Apple_newGene_4800	Apple_newGene_2398	Apple_newGene_4285	Apple_newGene_5137	Apple_newGene_3999	Apple_newGene_5641	Apple_newGene_2397	Apple_newGene_4799	MDP0000516622
Lupeol synthase activity		Apple_newGene_4800	MDP0000259369	Apple_newGene_4285	MDP0000034165	Apple_newGene_7203	Apple_newGene_5137	Apple_newGene_5641	Apple_newGene_2397	Apple_newGene_4799
ARF guanyl-nucleotide exchange factor activity		MDP0000278726	MDP0000410984	MDP0000282782	MDP0000167843	MDP0000889408
1,3-beta-D-glucan synthase activity		MDP0000229527	MDP0000177875	MDP0000318573	MDP0000230907	MDP0000169993	MDP0000915307
ATPase activity	coupled to transmembrane movement of substances	MDP0000278580	Apple_newGene_657	Apple_newGene_1983	Apple_newGene_2398	Apple_newGene_7203	Apple_newGene_5137	MDP0000683891	Apple_newGene_3999	Apple_newGene_5641	Apple_newGene_2397	Apple_newGene_4799	Apple_newGene_4800	Apple_newGene_4285
Biological process
vegetative to reproductive phase transition of meristem	MDP0000514023	Apple_newGene_2917	Apple_newGene_4669	MDP0000320505	Apple_newGene_4580	MDP0000325832	MDP0000920127	MDP0000553959	MDP0000196196	MDP0000177875	MDP0000232945	MDP0000124454	MDP0000320720	MDP0000252696	Apple_newGene_7105	MDP0000442611	Apple_newGene_2274	MDP0000686137	MDP0000410984	Apple_newGene_4725	MDP0000003574	MDP0000077683	MDP0000287069	Apple_newGene_2273	Apple_newGene_4818	MDP0000127334	MDP0000230907	Apple_newGene_1571	Apple_newGene_1878	MDP0000615948	MDP0000848218	MDP0000494976	Apple_newGene_5533	MDP0000432904	MDP0000132926	MDP0000151336	MDP0000822588	Apple_newGene_4819	MDP0000301510	MDP0000304607	MDP0000300795	Apple_newGene_5470	MDP0000167012	MDP0000134273	MDP0000229527	MDP0000271587	MDP0000266840	MDP0000148395	MDP0000320084
lead ion transport	MDP0000278580	Apple_newGene_4800	Apple_newGene_2398	Apple_newGene_4285	Apple_newGene_7203	Apple_newGene_5137	MDP0000224180	Apple_newGene_3999	Apple_newGene_5641	Apple_newGene_2397	Apple_newGene_4799
cellular response to indolebutyric acid stimulus	MDP0000278580	Apple_newGene_4800	Apple_newGene_2398	Apple_newGene_4285	Apple_newGene_7203	Apple_newGene_5137	MDP0000224180	Apple_newGene_5641	Apple_newGene_2397	Apple_newGene_4799
abscisic acid transport	MDP0000278580	Apple_newGene_4800	Apple_newGene_2398	Apple_newGene_4285	Apple_newGene_7203	Apple_newGene_5137	MDP0000224180	Apple_newGene_3999	Apple_newGene_5641	Apple_newGene_2397	Apple_newGene_4799
protein targeting to vacuole involved in ubiquitin-dependent protein catabolic process via the multivesicular body sorting pathway	MDP0000317971	MDP0000307848	MDP0000318443	MDP0000206447
defense response by callose deposition in cell wall	Apple_newGene_7203	Apple_newGene_5137	MDP0000230907	Apple_newGene_2397	MDP0000187155	Apple_newGene_4800	MDP0000229527	MDP0000224180	MDP0000278580	MDP0000150382	Apple_newGene_2398	MDP0000915307	MDP0000609114	MDP0000177875	Apple_newGene_5641	Apple_newGene_4799	Apple_newGene_4285	Apple_newGene_554
regulation of cell differentiation	Apple_newGene_2752	MDP0000169993	MDP0000564861	MDP0000127334	Apple_newGene_1571	Apple_newGene_4580	MDP0000410984	Apple_newGene_4725	MDP0000848218	MDP0000077683	Apple_newGene_5533	MDP0000581271	MDP0000148395	MDP0000320084	MDP0000209431	MDP0000003818	MDP0000252696
indole glucosinolate catabolic process	MDP0000278580	Apple_newGene_4800	Apple_newGene_2398	Apple_newGene_4285	Apple_newGene_7203	Apple_newGene_5137	MDP0000224180	Apple_newGene_5641	Apple_newGene_2397	Apple_newGene_4799
defense response	MDP0000716430	MDP0000183107	MDP0000206582	MDP0000399716	Apple_newGene_6310	MDP0000269848	MDP0000242554	Apple_newGene_1920	MDP0000320720	MDP0000252899	MDP0000291677	MDP0000201173	MDP0000854039	MDP0000580893	MDP0000382253	MDP0000143415	MDP0000560645	Apple_newGene_1826	MDP0000294379	MDP0000216638	MDP0000188790	MDP0000822588	Apple_newGene_27	MDP0000152940	Apple_newGene_5472	MDP0000846761	MDP0000259862	MDP0000607420	MDP0000383765	MDP0000210966	MDP0000665864	Apple_newGene_6322	MDP0000491894	MDP0000478441	MDP0000275483	Apple_newGene_4071	MDP0000195610	MDP0000230902	MDP0000694809	MDP0000103627	MDP0000519875	MDP0000158225	MDP0000312852	MDP0000257201	MDP0000484925	MDP0000374227	MDP0000190808	MDP0000928620	Apple_newGene_3006
trichome morphogenesis	MDP0000230883	MDP0000127334	Apple_newGene_1878	Apple_newGene_4580	MDP0000252504	MDP0000175425	MDP0000887107	Apple_newGene_5533	Apple_newGene_1135	MDP0000143487	MDP0000152873	MDP0000260771	Apple_newGene_5574	Apple_newGene_2752	MDP0000169993	MDP0000410984	MDP0000301925	Apple_newGene_4725	MDP0000293835	Apple_newGene_7059	MDP0000077683	MDP0000846874	Apple_newGene_7103	MDP0000144864	MDP0000269941	MDP0000437717	MDP0000032171	MDP0000213729	MDP0000003818
drug transmembrane transport	MDP0000278580	Apple_newGene_2398	MDP0000891117	Apple_newGene_7203	Apple_newGene_5137	MDP0000683891	Apple_newGene_3999	Apple_newGene_5641	Apple_newGene_2397	Apple_newGene_4799	Apple_newGene_4800	Apple_newGene_4285	MDP0000224180
[truncated: 134 more columns]

## Sheet: 24 GO_DEGs
	Supplementary Table S2 List of DEGs in significantly enriched GO terms
enriched Go terms	DEGs ID
Cellular Component:
cell wall	MDP0000547558	MDP0000296652	MDP0000539299	MDP0000287357	Apple_newGene_2282	MDP0000292477	MDP0000711379	MDP0000552328	MDP0000298069	MDP0000770103	MDP0000219684	MDP0000311765	MDP0000321473	MDP0000204597	MDP0000146063	MDP0000286168	MDP0000494976	MDP0000193220	MDP0000265046	MDP0000166139	Apple_newGene_3793	MDP0000279281	MDP0000322725	MDP0000194823	MDP0000158576	MDP0000183959	Apple_newGene_6952	MDP0000255452	MDP0000702868	MDP0000943164	MDP0000435467	MDP0000272783	MDP0000361876	MDP0000561738	MDP0000212593	MDP0000149332	MDP0000856775	MDP0000854241	MDP0000129315	MDP0000370611	MDP0000216217	MDP0000258387	MDP0000710761	MDP0000268608	MDP0000645828	MDP0000909991	MDP0000033287	MDP0000951799	MDP0000262752
extracellular region	MDP0000431696	MDP0000300728	MDP0000539299	MDP0000454027	MDP0000526206	MDP0000238087	MDP0000267128	MDP0000564236	MDP0000263589	MDP0000131267	MDP0000155077	MDP0000521662	MDP0000292477	MDP0000711379	MDP0000181608	MDP0000301828	MDP0000158437	MDP0000138500	MDP0000552328	MDP0000807958	MDP0000298069	MDP0000276859	MDP0000305189	MDP0000504183	MDP0000219684	MDP0000157044	MDP0000311765	MDP0000560468	MDP0000693745	MDP0000247130	MDP0000212045	MDP0000908881	MDP0000256960	MDP0000265046	MDP0000131646	MDP0000157380	Apple_newGene_429	MDP0000573746	MDP0000702868	MDP0000435467	Apple_newGene_3404	MDP0000574554	MDP0000933110	MDP0000560467	MDP0000361876	MDP0000561738	MDP0000429251	MDP0000163930	MDP0000752881
plant-type cell wall	MDP0000431696	MDP0000361876	MDP0000261115	MDP0000429251	MDP0000140344	MDP0000321387	MDP0000306888	MDP0000238087	MDP0000267128	MDP0000016671	MDP0000370611	MDP0000263589	MDP0000075705	MDP0000772420	MDP0000282531	MDP0000195798	MDP0000488361	MDP0000521662	MDP0000288732	MDP0000229126	MDP0000321326	MDP0000301828	MDP0000154541	MDP0000909991	MDP0000138500	MDP0000251943	MDP0000904458	MDP0000807958	MDP0000227393	MDP0000303101	MDP0000504183	MDP0000482479	MDP0000364685	MDP0000094767	MDP0000560468	MDP0000743239	MDP0000329063	MDP0000245693	MDP0000146709	MDP0000771647	MDP0000200231	MDP0000721987	MDP0000265046	MDP0000899966	Apple_newGene_3793	MDP0000030527	MDP0000138035	MDP0000778016	MDP0000134680
extracellular region part	MDP0000265527	MDP0000221075	MDP0000207423	MDP0000131763	MDP0000467113	MDP0000305007	MDP0000167338	MDP0000835812	Apple_newGene_2312	MDP0000909991	MDP0000797782	MDP0000314088	MDP0000904458	MDP0000629767
anchored component of plasma membrane	MDP0000658332	MDP0000288732	MDP0000181608	MDP0000321326	MDP0000429251	MDP0000289320	MDP0000321387	MDP0000125336	MDP0000306888	MDP0000522743	MDP0000230557	Apple_newGene_6952	MDP0000251943	MDP0000904458	MDP0000696314	MDP0000573746	MDP0000276859	MDP0000094767	MDP0000277149	MDP0000223726	MDP0000282531	MDP0000716700
anchored component of membrane	MDP0000268608	MDP0000296280	MDP0000296652	MDP0000268505	MDP0000312492	MDP0000951420	MDP0000479478	MDP0000157828	MDP0000456916	MDP0000827881	MDP0000221075	MDP0000362571	MDP0000298069	MDP0000276859	MDP0000834121
polyketide synthase complex	MDP0000287919	MDP0000716308	Apple_newGene_2903	MDP0000302905
Molecular Function:
structural constituent of cell wall	MDP0000743239	MDP0000560112	MDP0000138500	MDP0000772420	MDP0000574554	MDP0000521662	MDP0000697206	MDP0000431696	MDP0000195798	MDP0000504183	MDP0000228494
chalcone isomerase activity	MDP0000684169	MDP0000682953	MDP0000205890	MDP0000274127	MDP0000759336
2,3,4,5-tetrahydropyridine-2,5-tetrahydropyridine-2	MDP0000716308	Apple_newGene_2903	MDP0000287919	MDP0000302905
biphenyl synthase activity	MDP0000716308	Apple_newGene_2903	MDP0000287919	MDP0000302905
Biological Process:
syncytium formation	MDP0000743239	MDP0000885425	MDP0000560112	MDP0000138500	MDP0000772420	MDP0000574554	MDP0000521662	Apple_newGene_1445	MDP0000697206	MDP0000431696	MDP0000195798	MDP0000504183	MDP0000228494	MDP0000435467
plant-type cell wall loosening	MDP0000743239	MDP0000560112	MDP0000138500	MDP0000772420	MDP0000574554	MDP0000521662	MDP0000697206	MDP0000431696	MDP0000195798	MDP0000504183	MDP0000228494	MDP0000435467
plant-type cell wall modification involved in multidimensional cell growth	MDP0000743239	MDP0000560112	MDP0000138500	MDP0000772420	MDP0000574554	MDP0000521662	MDP0000431696	MDP0000697206	MDP0000195798	MDP0000504183	MDP0000228494
regulation of cell size	Apple_newGene_6514	Apple_newGene_1437	Apple_newGene_1445	MDP0000361876	MDP0000849544	MDP0000213864	MDP0000200231	MDP0000138035	MDP0000320690	MDP0000658332	MDP0000265271	MDP0000288732	MDP0000221376	MDP0000181608	MDP0000321326	Apple_newGene_634	MDP0000868556	Apple_newGene_6513	MDP0000885425	MDP0000251943	MDP0000904458	MDP0000573746	MDP0000276859	MDP0000094767	MDP0000277149	MDP0000223726	MDP0000267351	MDP0000910106
polyamine catabolic process	MDP0000827894	MDP0000656929	MDP0000177010	Apple_newGene_7050	MDP0000261625	MDP0000184538	MDP0000157871	MDP0000828077	MDP0000702799	MDP0000127605	MDP0000659907	MDP0000887107	MDP0000853274	MDP0000227393	Apple_newGene_3728	MDP0000265046	MDP0000899966	MDP0000318013	MDP0000175968	MDP0000143156	MDP0000030527
response to karrikin	MDP0000561738	MDP0000797782	MDP0000238087	MDP0000291807	MDP0000708334	MDP0000360443	MDP0000150382	MDP0000300452	MDP0000252784	MDP0000260404	MDP0000426374	MDP0000787216	Apple_newGene_2282	MDP0000807958	MDP0000262911	MDP0000188337	MDP0000318013	MDP0000648218	MDP0000693745	MDP0000212045	MDP0000245693	MDP0000202831	MDP0000319417	MDP0000555329	MDP0000213864	MDP0000935832	MDP0000265046	MDP0000778016	MDP0000280240	MDP0000312601	MDP0000294667	Apple_newGene_634	MDP0000522743	MDP0000207369	MDP0000267351	MDP0000272783
auxin polar transport	Apple_newGene_6514	Apple_newGene_1437	Apple_newGene_1445	MDP0000361876	MDP0000213864	MDP0000200231	MDP0000138035	MDP0000658332	MDP0000288732	MDP0000181608	MDP0000321326	Apple_newGene_634	Apple_newGene_6513	MDP0000885425	MDP0000251943	MDP0000904458	MDP0000573746	MDP0000276859	MDP0000094767	MDP0000277149	MDP0000223726	MDP0000267351	MDP0000154046
pattern specification process	Apple_newGene_6514	MDP0000131759	Apple_newGene_1437	Apple_newGene_1445	MDP0000221238	MDP0000249827	MDP0000361876	Apple_newGene_5616	MDP0000849544	MDP0000213864	MDP0000803920	MDP0000320690	MDP0000658332	MDP0000265271	MDP0000288732	MDP0000181608	MDP0000305922	MDP0000064909	MDP0000321326	Apple_newGene_634	Apple_newGene_6513	MDP0000251943	MDP0000904458	MDP0000573746	MDP0000276859	MDP0000094767	MDP0000277149	MDP0000157044	MDP0000223726
cellular modified amino acid biosynthetic process	MDP0000827894	MDP0000656929	MDP0000177010	Apple_newGene_7050	MDP0000184538	MDP0000157871	MDP0000828077	MDP0000127605	MDP0000659907	MDP0000887107	MDP0000853274	MDP0000227393	Apple_newGene_3728	MDP0000265046	MDP0000899966	MDP0000318013	MDP0000175968	MDP0000143156	MDP0000030527
response to wounding	MDP0000177010	MDP0000454027	MDP0000326735	MDP0000656929	MDP0000167308	MDP0000868556	MDP0000307780	MDP0000287029	MDP0000131759	MDP0000835812	MDP0000146709	MDP0000319417	MDP0000046192	MDP0000292425	Apple_newGene_3793	Apple_newGene_1831	MDP0000482565	MDP0000194823	MDP0000243375	MDP0000258562	MDP0000670256	Apple_newGene_4617	MDP0000500210	Apple_newGene_5450	Apple_newGene_3728	MDP0000211556	MDP0000142583	Apple_newGene_5841	MDP0000146703	MDP0000184538	MDP0000361876	MDP0000561738	MDP0000932292	MDP0000135837	MDP0000157712	MDP0000291807	MDP0000360443	MDP0000573176	Apple_newGene_7050	MDP0000157871	MDP0000231369	Apple_newGene_4616	MDP0000899281	MDP0000318013	MDP0000520035	MDP0000239834	MDP0000129053	MDP0000325495	MDP0000297646
2-hydroxybenzoyl-CoA catabolic process	MDP0000716308	Apple_newGene_2903	MDP0000287919	MDP0000302905
4-hydroxycoumarin biosynthetic process	MDP0000716308	Apple_newGene_2903	MDP0000287919	MDP0000302905
phytoalexin biosynthetic process	MDP0000716308	Apple_newGene_2903	MDP0000287919	MDP0000302905
[truncated: 40 more columns]

## Sheet: 48 GO_DEGs
	Supplementary Table S2 List of DEGs in significantly enriched GO terms
enriched Go terms	DEGs ID
Biological Process:
response to UV-B	MDP0000012541	MDP0000319417	MDP0000207937	MDP0000360443	MDP0000887107	MDP0000134791	MDP0000787168	Apple_newGene_4740	MDP0000318495	Apple_newGene_4230	MDP0000286933	Apple_newGene_7050	Apple_newGene_1019	MDP0000261492	MDP0000205306	MDP0000405936	MDP0000782642	MDP0000152900	MDP0000864442	Apple_newGene_3728	Apple_newGene_3454	MDP0000437717	MDP0000318013	Apple_newGene_3829	MDP0000287302	MDP0000691789
response to wounding	MDP0000889931	MDP0000276435	MDP0000836708	MDP0000411575	Apple_newGene_554	MDP0000300274	MDP0000656929	MDP0000307780	MDP0000301606	MDP0000301927	MDP0000835812	MDP0000319417	MDP0000264424	MDP0000745475	Apple_newGene_511	MDP0000482565	MDP0000670256	MDP0000273819	MDP0000300043	Apple_newGene_3728	MDP0000480581	MDP0000437717	MDP0000211556	MDP0000183061	MDP0000361876	MDP0000262620	MDP0000360443	MDP0000573176	MDP0000134397	Apple_newGene_7050	MDP0000157871	MDP0000453188	MDP0000318013	MDP0000691789	MDP0000226279	MDP0000131115	MDP0000129053	MDP0000123467	MDP0000887107	MDP0000456277	MDP0000782875	MDP0000257474	MDP0000133622	MDP0000126517
response to biotic stimulus	MDP0000195614	MDP0000189331	MDP0000903417	MDP0000293143	MDP0000103621	MDP0000360394	Apple_newGene_2312	MDP0000831518	MDP0000259661	MDP0000103627	MDP0000239643
positive regulation of flavonoid biosynthetic process	MDP0000226279	Apple_newGene_7203	MDP0000131115	MDP0000129053	MDP0000264424	MDP0000836708	MDP0000745475	MDP0000790376	MDP0000134397	MDP0000939633	MDP0000656929	MDP0000838035	MDP0000456277	MDP0000219234	MDP0000307780	MDP0000301927	MDP0000126517	Apple_newGene_2490	MDP0000691789
defense response to fungus	MDP0000276435	MDP0000318860	MDP0000936740	MDP0000810260	MDP0000515971	MDP0000118810	MDP0000163811	MDP0000261585	MDP0000196417	MDP0000313460	Apple_newGene_3829	MDP0000268045	MDP0000259085	MDP0000870727	MDP0000303018	MDP0000322755	Apple_newGene_680	MDP0000219521	MDP0000670256	MDP0000242979	MDP0000273819	Apple_newGene_3728	MDP0000480581	MDP0000437717	MDP0000183061	MDP0000262620	MDP0000266004	MDP0000581426	Apple_newGene_2759	MDP0000782085	Apple_newGene_7050	MDP0000253189	MDP0000094767	MDP0000287302	MDP0000691789	MDP0000123467	MDP0000887107	MDP0000930401	MDP0000362305	MDP0000838035	MDP0000782642	MDP0000782875
regulation of plant-type hypersensitive response	MDP0000936740	MDP0000810260	MDP0000515971	MDP0000790376	MDP0000163811	MDP0000196417	MDP0000307780	MDP0000923305	MDP0000301927	Apple_newGene_3829	MDP0000268045	MDP0000259085	MDP0000264424	MDP0000322755	MDP0000939633	Apple_newGene_680	MDP0000670256	MDP0000273819	MDP0000092478	Apple_newGene_5844	MDP0000480581	Apple_newGene_2490	MDP0000183061	MDP0000262620	MDP0000134397	MDP0000903417	MDP0000691789	Apple_newGene_7203	MDP0000131115	MDP0000129053	MDP0000123467	MDP0000838035	MDP0000162579	MDP0000201129	MDP0000219234	MDP0000239643	MDP0000782642	MDP0000782875	MDP0000126517
coumarin biosynthetic process	MDP0000226279	MDP0000129053	MDP0000319417	MDP0000887107	MDP0000264424	MDP0000836708	MDP0000745475	MDP0000134397	MDP0000411575	MDP0000656929	MDP0000456277	Apple_newGene_7050	MDP0000157871	MDP0000307780	Apple_newGene_3728	MDP0000437717	MDP0000318013	MDP0000691789
response to karrikin	MDP0000360443	MDP0000300452	MDP0000134791	MDP0000134397	MDP0000787216	MDP0000787168	Apple_newGene_1019	MDP0000169611	MDP0000923305	MDP0000318013	MDP0000212045	MDP0000319417	MDP0000555329	MDP0000935832	MDP0000127542	MDP0000939633	MDP0000261492	MDP0000522743	MDP0000248907	MDP0000405936	MDP0000266497	MDP0000092478	MDP0000437717
killing of cells of other organism	MDP0000287302	Apple_newGene_3829	MDP0000261585	Apple_newGene_2759	MDP0000782642
defense response	MDP0000686021	Apple_newGene_1019	MDP0000261585	MDP0000923305	MDP0000219538	MDP0000416021	MDP0000152377	Apple_newGene_4103	MDP0000188790	MDP0000831518	MDP0000259661	MDP0000210084	MDP0000181641	Apple_newGene_5871	MDP0000273819	Apple_newGene_5472	MDP0000375826	MDP0000161883	Apple_newGene_5971	Apple_newGene_2759	MDP0000189331	MDP0000903417	MDP0000573272	MDP0000103627	Apple_newGene_1115	MDP0000673134	MDP0000195614	MDP0000221238	MDP0000360394	Apple_newGene_2312	MDP0000144306	MDP0000362305	MDP0000293143	MDP0000103621	MDP0000239643	MDP0000249640
cellular modified amino acid biosynthetic process	MDP0000226279	MDP0000201058	MDP0000656929	MDP0000456277	Apple_newGene_7050	MDP0000157871	MDP0000127605	MDP0000887107	MDP0000745475	MDP0000127542	Apple_newGene_3728	MDP0000437717	MDP0000318013	MDP0000691789
polyamine catabolic process	MDP0000226279	MDP0000201058	MDP0000656929	MDP0000456277	Apple_newGene_7050	MDP0000157871	MDP0000127605	MDP0000887107	MDP0000745475	MDP0000127542	Apple_newGene_3728	MDP0000437717	MDP0000318013	MDP0000691789
protein targeting to membrane	MDP0000936740	MDP0000810260	MDP0000515971	MDP0000790376	MDP0000163811	MDP0000196417	MDP0000307780	MDP0000923305	MDP0000301927	Apple_newGene_3829	MDP0000259085	MDP0000264424	MDP0000939633	Apple_newGene_680	MDP0000670256	MDP0000273819	MDP0000092478	MDP0000480581	Apple_newGene_2490	MDP0000183061	MDP0000262620	MDP0000134397	MDP0000903417	MDP0000691789	Apple_newGene_7203	MDP0000131115	MDP0000129053	MDP0000123467	MDP0000838035	MDP0000162579	MDP0000219234	MDP0000239643	MDP0000782642	MDP0000782875	MDP0000126517
anthocyanin-containing compound biosynthetic process	MDP0000286933	Apple_newGene_4230	Apple_newGene_511	Apple_newGene_1019	MDP0000206093	MDP0000123467	MDP0000405936	MDP0000360443	MDP0000134791	MDP0000480581	Apple_newGene_3454	MDP0000691789
response to chitin	MDP0000318860	MDP0000936740	MDP0000810260	MDP0000515971	MDP0000247896	MDP0000118810	MDP0000163811	MDP0000196417	Apple_newGene_3829	MDP0000268045	MDP0000259085	MDP0000241310	MDP0000322755	MDP0000939633	Apple_newGene_680	MDP0000805422	MDP0000321891	MDP0000242979	MDP0000480581	MDP0000156351	MDP0000211556	MDP0000183061	MDP0000602139	MDP0000361876	MDP0000573176	MDP0000903417	MDP0000172095	MDP0000253189	Apple_newGene_7203	MDP0000123467	MDP0000838035	MDP0000219234	MDP0000239643	MDP0000782642	MDP0000782875
lignin biosynthetic process	MDP0000226279	MDP0000268045	MDP0000656929	MDP0000456277	MDP0000201129	MDP0000205306	MDP0000307780	MDP0000264424	MDP0000836708	MDP0000152900	Apple_newGene_5844	MDP0000745475	MDP0000322755

## Sheet: 72 GO_DEGs
	Supplementary Table S2 List of DEGs in significantly enriched GO terms
enriched Go terms	DEGs ID
Molecular Function:
hydrolase activity	hydrolyzing O-glycosyl compounds	MDP0000265527	MDP0000859587	MDP0000870727	MDP0000247130	MDP0000158544	MDP0000178787	MDP0000313460	MDP0000218691	MDP0000609149	MDP0000233177	MDP0000314088
metal ion binding	MDP0000701561	MDP0000306888	MDP0000670935	MDP0000007682	MDP0000755722	MDP0000286185	MDP0000168128	Apple_newGene_7255	MDP0000265100	MDP0000770103	MDP0000930268	MDP0000652388	MDP0000547655	MDP0000573746	MDP0000600528	MDP0000399965	MDP0000301417	MDP0000181053	MDP0000265101	MDP0000248981	MDP0000300410	MDP0000708299	MDP0000151118	MDP0000466683	MDP0000692178	MDP0000226279	MDP0000126274	MDP0000168825	MDP0000303260	MDP0000838035	MDP0000231812	MDP0000522743	Apple_newGene_1401	MDP0000269358	MDP0000274385	MDP0000190959	MDP0000312559
Biological Process:
response to biotic stimulus	MDP0000260110	MDP0000195614	MDP0000903417	MDP0000293143	MDP0000288293	MDP0000533638	MDP0000611200	MDP0000103621	Apple_newGene_2312	MDP0000103627	MDP0000239643
regulation of plant-type hypersensitive response	MDP0000278380	MDP0000219838	MDP0000810260	MDP0000278580	MDP0000208617	MDP0000171185	MDP0000177906	MDP0000196417	MDP0000288670	MDP0000307780	MDP0000268045	MDP0000320363	MDP0000259085	MDP0000305846	MDP0000264424	MDP0000322755	MDP0000574556	MDP0000670256	MDP0000220527	MDP0000092478	MDP0000600528	MDP0000790420	MDP0000301417	MDP0000903417	MDP0000708299	MDP0000754989	MDP0000691789	MDP0000224810	MDP0000939266	MDP0000131115	MDP0000273436	Apple_newGene_6664	MDP0000244946	MDP0000838035	MDP0000162579	MDP0000566547	MDP0000201129	MDP0000239643	MDP0000266741	MDP0000782875
protein targeting to membrane	MDP0000278380	MDP0000219838	MDP0000810260	MDP0000278580	MDP0000208617	MDP0000171185	MDP0000177906	MDP0000196417	MDP0000288670	MDP0000307780	MDP0000320363	MDP0000259085	MDP0000305846	MDP0000264424	MDP0000872868	MDP0000574556	MDP0000670256	MDP0000220527	MDP0000092478	MDP0000600528	MDP0000790420	MDP0000301417	MDP0000903417	MDP0000708299	MDP0000754989	MDP0000691789	MDP0000224810	MDP0000939266	MDP0000131115	MDP0000273436	Apple_newGene_6664	MDP0000244946	MDP0000838035	MDP0000162579	MDP0000566547	MDP0000239643	MDP0000266741	MDP0000782875
positive regulation of flavonoid biosynthetic process	MDP0000226279	MDP0000131115	MDP0000264424	MDP0000278580	MDP0000836708	MDP0000208617	MDP0000301417	MDP0000745475	MDP0000244946	MDP0000838035	MDP0000456277	MDP0000708299	MDP0000754989	MDP0000307780	MDP0000600528	MDP0000691789
response to chitin	MDP0000278380	MDP0000810260	MDP0000278580	MDP0000247896	MDP0000118810	MDP0000177906	MDP0000196417	Apple_newGene_3484	MDP0000235313	MDP0000268045	MDP0000259085	Apple_newGene_1370	MDP0000322755	MDP0000872868	MDP0000574556	MDP0000187312	MDP0000321891	MDP0000242979	MDP0000252347	MDP0000156351	MDP0000211556	MDP0000790420	MDP0000158544	MDP0000301417	Apple_newGene_39	MDP0000903417	MDP0000708299	Apple_newGene_3370	MDP0000273436	Apple_newGene_6664	MDP0000838035	MDP0000566547	MDP0000239643	MDP0000226115	MDP0000257423	MDP0000782875
defense response to fungus	MDP0000278380	MDP0000296652	MDP0000375992	MDP0000810260	MDP0000118810	MDP0000177906	MDP0000196417	MDP0000313460	MDP0000268045	MDP0000259085	MDP0000870727	MDP0000322755	MDP0000872868	MDP0000574556	MDP0000859587	MDP0000219521	MDP0000670256	MDP0000220527	MDP0000242979	Apple_newGene_3728	MDP0000790420	MDP0000301417	MDP0000782085	Apple_newGene_7050	MDP0000708299	MDP0000287302	MDP0000691789	MDP0000939266	MDP0000273436	Apple_newGene_6664	MDP0000930401	MDP0000838035	MDP0000156208	MDP0000566547	MDP0000755938	MDP0000226115	MDP0000782875
systemic acquired resistance	salicylic acid mediated signaling pathway	MDP0000191887	MDP0000219838	MDP0000810260	MDP0000192847	MDP0000278580	MDP0000177906	MDP0000903417	MDP0000386317	MDP0000196417	MDP0000288670	MDP0000224810	MDP0000320363	MDP0000259085	MDP0000939266	MDP0000131115	MDP0000273436	MDP0000186576	Apple_newGene_6664	MDP0000872868	MDP0000574556	MDP0000566547	MDP0000220527	MDP0000239643	MDP0000790420
