# Supplementary material for: Dynamic transcription profiles of “Qinguan” apple (Malus × domestica) leaves in response to Marssonina coronaria inoculation
Source: Front Plant Sci. 2015 Oct 13;6:842. doi: 10.3389/fpls.2015.00842 (PMC4602106; doi:10.3389/fpls.2015.00842)
Supplement: Supplementary file 3 [file Table3.XLS]

## Sheet: 24 KEGG_DEGs
		Supplementary Table S3 List of DEGs in significantly enriched KEGG pathways
time point	enriched KEGG pathway	DEGs ID
24 hpi	Flavonoid biosynthesis	Apple_newGene_2903	Apple_newGene_4230	MDP0000205890	MDP0000274127	MDP0000287029	MDP0000287919	MDP0000302905	MDP0000307780	MDP0000320264	MDP0000360443	MDP0000494976	MDP0000682953	MDP0000684169	MDP0000716308	MDP0000759336
	Vitamin B6 metabolism	MDP0000010587	MDP0000207937	MDP0000275383	MDP0000555175	MDP0000670637
48 hpi	Phenylpropanoid biosynthesis	Apple_newGene_4180	MDP0000152900	MDP0000205306	MDP0000217844	MDP0000226279	MDP0000261492	MDP0000264424	MDP0000268045	MDP0000307780	MDP0000322755	MDP0000515971	MDP0000691789	MDP0000787168	MDP0000836708
	Flavonoid biosynthesis	Apple_newGene_4230	MDP0000226279	MDP0000264424	MDP0000286933	MDP0000307780	MDP0000320264	MDP0000360443	MDP0000759336	MDP0000836708
	Stilbenoid, diarylheptanoid and gingerol biosynthesis	MDP0000226279	MDP0000264424	MDP0000307780	MDP0000836708
72 hpi	Phenylpropanoid biosynthesis	MDP0000152900	MDP0000190959	MDP0000205306	MDP0000226279	MDP0000264424	MDP0000268045	MDP0000307780	MDP0000322755	MDP0000691789	MDP0000750217	MDP0000787168	MDP0000836708
	Stilbenoid, diarylheptanoid and gingerol biosynthesis	MDP0000226279	MDP0000264424	MDP0000307780	MDP0000836708
	Flavonoid biosynthesis	Apple_newGene_2903	MDP0000226279	MDP0000264424	MDP0000307780	MDP0000836708
